# Supplementary material for: Towards a Novel Patch Material for Cardiac Applications: Tissue-Specific Extracellular Matrix Introduces Essential Key Features to Decellularized Amniotic Membrane
Source: PubMed Central journal article supplement (PMC5979550; doi:10.3390/ijms19041032), 2018-03-29
Supplement: ijms-19-01032-s001.pdf [file ijms-19-01032-s001.pdf]

# Supplementary Materials: Towards a Novel Patch Material for Cardiac Applications: Tissue-Specific Extracellular Matrix Introduces Essential Key Features to Decellularized Amniotic Membrane

Matthias Becker, Janita A. Maring, Maria Schneider, Aarón X. Herrera Martin, Martina Seifert, Oliver Klein, Thorsten Braun, Volkmar Falk and Christof Stamm

Table S1. Proteins in hgECM identified by mass spectrometry.

| Accession   | Name                                                                                               | Scores A | Scores B | Scores C | Matches |
|-------------|----------------------------------------------------------------------------------------------------|----------|----------|----------|---------|
| A2MG_HUMAN  | Alpha-2-macroglobulin OS=Homo sapiens GN=A2M PE=1 SV=3                                             |          | 114.4    | 13.7     | 1       |
| AATM_HUMAN  | Aspartate aminotransferase, mitochondrial OS=Homo sapiens GN=GOT2 PE=1 SV=3                        | 42.1     |          | 13.2     | 1       |
| ACADV_HUMAN | Very long-chain specific acyl-CoA dehydrogenase, mitochondrial OS=Homo sapiens GN=ACADVL PE=1 SV=1 | 22.3     |          | 31.4     | 2       |
| ACON_HUMAN  | Aconitate hydratase, mitochondrial OS=Homo sapiens GN=ACO2 PE=1 SV=2                               | 156.9    |          | 66.7     | 3       |
| ACTA_HUMAN  | Actin, aortic smooth muscle OS=Homo sapiens GN=ACTA2 PE=1 SV=1                                     | 1247.8   | 34.6     | 1149.1   | 8       |
| ACTN2_HUMAN | Alpha-actinin-2 OS=Homo sapiens GN=ACTN2 PE=1 SV=1                                                 | 806.3    |          | 835.8    | 9       |
| ACTS_HUMAN  | Actin, alpha skeletal muscle OS=Homo sapiens GN=ACTA1 PE=1 SV=1                                    | 840.3    |          | 990.5    | 7       |
| ADT1_HUMAN  | ADP/ATP translocase 1 OS=Homo sapiens GN=SLC25A4 PE=1 SV=4                                         | 360.9    |          | 401.3    | 7       |
| ADT3_HUMAN  | ADP/ATP translocase 3 OS=Homo sapiens GN=SLC25A6 PE=1 SV=4                                         |          |          | 231.7    | 5       |
| ALBU_HUMAN  | Serum albumin OS=Homo sapiens GN=ALB PE=1 SV=2                                                     | 269.8    | 292.1    | 47.1     | 4       |
| APOA1_HUMAN | Apolipoprotein A-I OS=Homo sapiens GN=APOA1 PE=1 SV=1                                              | 67.3     | 76.9     | 27.0     | 1       |

|             |                                                                                                |       |         |       |   |
|-------------|------------------------------------------------------------------------------------------------|-------|---------|-------|---|
| ARHL1_HUMAN | [Protein ADP-ribosylarginine]<br>hydrolase-like protein 1 OS=Homo sapiens GN=ADPRHL1 PE=2 SV=1 | 48.3  |         | 31.0  | 1 |
| AT2A1_HUMAN | Sarcoplasmic/endoplasmic reticulum calcium ATPase 1 OS=Homo sapiens GN=ATP2A1 PE=1 SV=1        |       |         | 151.1 | 1 |
| ATP5I_HUMAN | ATP synthase subunit e, mitochondrial OS=Homo sapiens GN=ATP5I PE=1 SV=2                       |       |         | 42.1  | 1 |
| ATP6_HUMAN  | ATP synthase subunit a OS=Homo sapiens GN=MT-ATP6 PE=1 SV=1                                    | 112.5 |         | 82.2  | 1 |
| ATPA_HUMAN  | ATP synthase subunit alpha, mitochondrial OS=Homo sapiens GN=ATP5A1 PE=1 SV=1                  | 165.1 |         | 51.6  | 4 |
| ATPB_HUMAN  | ATP synthase subunit beta, mitochondrial OS=Homo sapiens GN=ATP5B PE=1 SV=3                    | 108.1 |         | 155.2 | 1 |
| ATPK_HUMAN  | ATP synthase subunit f, mitochondrial OS=Homo sapiens GN=ATP5J2 PE=1 SV=3                      | 308.0 | 29.7    | 580.1 | 2 |
| CAV1_HUMAN  | Caveolin-1 OS=Homo sapiens GN=CAV1 PE=1 SV=4                                                   | 108.6 | 84.5    | 31.0  | 1 |
| CHIA_HUMAN  | Acidic mammalian chitinase OS=Homo sapiens GN=CHIA PE=1 SV=1                                   |       |         | 245.1 | 1 |
| CMC1_HUMAN  | Calcium-binding mitochondrial carrier protein Aralar1 OS=Homo sapiens GN=SLC25A12 PE=1 SV=2    | 73.7  |         | 30.9  | 1 |
| CO1A1_HUMAN | Collagen alpha-1(I) chain OS=Homo sapiens GN=COL1A1 PE=1 SV=5                                  | 327.8 | 695.0   | 598.4 | 6 |
| CO3_HUMAN   | Complement C3 OS=Homo sapiens GN=C3 PE=1 SV=2                                                  | 95.0  | 430.9   | 141.9 | 2 |
| CO3A1_HUMAN | Collagen alpha-1(III) chain OS=Homo sapiens GN=COL3A1 PE=1 SV=4                                | 18.5  | 299.4   | 614.5 | 2 |
| CO4A2_HUMAN | Collagen alpha-2(IV) chain OS=Homo sapiens GN=COL4A2 PE=1 SV=4                                 | 294.3 | 428.4   | 642.1 | 5 |
| CO5A3_HUMAN | Collagen alpha-3(V) chain OS=Homo sapiens GN=COL5A3 PE=1 SV=3                                  |       | 60.5    | 22.8  | 1 |
| CO6A3_HUMAN | Collagen alpha-3(VI) chain OS=Homo sapiens GN=COL6A3 PE=1 SV=5                                 | 988.4 | 12200.9 | 27.0  | 1 |
| COX1_HUMAN  | Cytochrome c oxidase subunit 1 OS=Homo sapiens GN=MT-CO1 PE=1 SV=1                             | 212.6 |         | 434.9 | 1 |

|             |                                                                                           |        |        |       |   |
|-------------|-------------------------------------------------------------------------------------------|--------|--------|-------|---|
| COX2_HUMAN  | Cytochrome c oxidase subunit 2<br>OS=Homo sapiens GN=MT-CO2<br>PE=1 SV=1                  | 15.4   |        | 40.8  | 2 |
| COX3_HUMAN  | Cytochrome c oxidase subunit 3<br>OS=Homo sapiens GN=MT-CO3<br>PE=1 SV=2                  | 70.4   |        | 13.7  | 1 |
| CRYAB_HUMAN | Alpha-crystallin B chain OS=Homo sapiens GN=CRYAB PE=1 SV=2                               | 78.4   | 22.5   | 54.9  | 3 |
| CTRO_HUMAN  | Citron Rho-interacting kinase<br>OS=Homo sapiens GN=CIT PE=1<br>SV=2                      |        |        | 13.7  | 1 |
| CX7A1_HUMAN | Cytochrome c oxidase subunit 7A1,<br>mitochondrial OS=Homo sapiens<br>GN=COX7A1 PE=1 SV=2 | 61.4   |        | 51.8  | 2 |
| CYB_HUMAN   | Cytochrome b OS=Homo sapiens<br>GN=MT-CYB PE=1 SV=2                                       | 45.5   |        | 144.0 | 1 |
| CYC_HUMAN   | Cytochrome c OS=Homo sapiens<br>GN=CYCS PE=1 SV=2                                         | 32.5   |        | 15.1  | 1 |
| DDX6_HUMAN  | Probable ATP-dependent RNA<br>helicase DDX6 OS=Homo sapiens<br>GN=DDX6 PE=1 SV=2          | 22.2   | 52.0   | 31.0  | 1 |
| DERM_HUMAN  | Dermatopontin OS=Homo sapiens<br>GN=DPT PE=1 SV=2                                         | 85.1   | 84.1   | 27.0  | 1 |
| DESM_HUMAN  | Desmin OS=Homo sapiens GN=DES<br>PE=1 SV=3                                                | 174.1  |        | 438.3 | 2 |
| ECD_HUMAN   | Protein ecdysoneless homolog<br>OS=Homo sapiens GN=ECD PE=1<br>SV=1                       |        |        | 22.8  | 1 |
| EF1A2_HUMAN | Elongation factor 1-alpha 2 OS=Homo sapiens GN=EEF1A2 PE=1 SV=1                           | 284.5  |        | 66.5  | 2 |
| FABPH_HUMAN | Fatty acid-binding protein, heart<br>OS=Homo sapiens GN=FABP3 PE=1<br>SV=4                | 141.1  |        | 31.0  | 1 |
| FBN1_HUMAN  | Fibrillin-1 OS=Homo sapiens<br>GN=FBN1 PE=1 SV=3                                          | 248.7  | 107.6  | 41.4  | 3 |
| FHL1_HUMAN  | Four and a half LIM domains protein<br>1 OS=Homo sapiens GN=FHL1 PE=1<br>SV=4             | 102.9  |        | 94.3  | 1 |
| FHL2_HUMAN  | Four and a half LIM domains protein<br>2 OS=Homo sapiens GN=FHL2 PE=1<br>SV=3             | 42.9   |        | 46.3  | 1 |
| FINC_HUMAN  | Fibronectin OS=Homo sapiens<br>GN=FN1 PE=1 SV=4                                           | 1698.4 | 9406.0 | 27.0  | 1 |

|             |                                                                                                         |       |        |       |   |
|-------------|---------------------------------------------------------------------------------------------------------|-------|--------|-------|---|
| FLNC_HUMAN  | Filamin-C OS=Homo sapiens<br>GN=FLNC PE=1 SV=3                                                          | 692.1 |        | 43.1  | 2 |
| G3P_HUMAN   | Glyceraldehyde-3-phosphate<br>dehydrogenase OS=Homo sapiens<br>GN=GAPDH PE=1 SV=3                       | 204.4 | 125.2  | 105.8 | 3 |
| GELS_HUMAN  | Gelsolin OS=Homo sapiens GN=GSN<br>PE=1 SV=1                                                            | 66.9  | 41.2   | 13.7  | 1 |
| GHITM_HUMAN | Growth hormone-inducible<br>transmembrane protein OS=Homo<br>sapiens GN=GHITM PE=1 SV=2                 | 22.5  |        | 13.7  | 1 |
| GPAA1_HUMAN | Glycosylphosphatidylinositol anchor<br>attachment 1 protein OS=Homo<br>sapiens GN=GPAA1 PE=1 SV=3       |       |        | 13.7  | 1 |
| GYS1_HUMAN  | Glycogen [starch] synthase, muscle<br>OS=Homo sapiens GN=GYS1 PE=1<br>SV=2                              | 47.7  |        | 38.3  | 1 |
| H4_HUMAN    | Histone H4 OS=Homo sapiens<br>GN=HIST1H4A PE=1 SV=2                                                     | 250.7 | 277.8  | 23.0  | 2 |
| HBB_HUMAN   | Hemoglobin subunit beta OS=Homo<br>sapiens GN=HBB PE=1 SV=2                                             | 394.3 | 1418.0 | 28.3  | 1 |
| HEMO_HUMAN  | Hemopexin OS=Homo sapiens<br>GN=HPX PE=1 SV=2                                                           |       |        | 27.0  | 1 |
| HHATL_HUMAN | Protein-cysteine N-<br>palmitoyltransferase HHAT-like<br>protein OS=Homo sapiens<br>GN=HHATL PE=2 SV=1  | 227.9 |        | 23.5  | 2 |
| HS71A_HUMAN | Heat shock 70 kDa protein 1A<br>OS=Homo sapiens GN=HSPA1A<br>PE=1 SV=1                                  | 37.7  | 145.9  | 89.1  | 2 |
| HSPB1_HUMAN | Heat shock protein beta-1 OS=Homo<br>sapiens GN=HSPB1 PE=1 SV=2                                         | 39.7  | 142.8  | 152.9 | 1 |
| IDH3G_HUMAN | Isocitrate dehydrogenase [NAD]<br>subunit gamma, mitochondrial<br>OS=Homo sapiens GN=IDH3G PE=1<br>SV=1 |       |        | 27.0  | 1 |
| IGHG1_HUMAN | Ig gamma-1 chain C region<br>OS=Homo sapiens GN=IGHG1 PE=1<br>SV=1                                      | 26.9  | 204.3  | 88.2  | 1 |
| IGKC_HUMAN  | Ig kappa chain C region OS=Homo<br>sapiens GN=IGKC PE=1 SV=1                                            | 96.0  |        | 60.1  | 2 |
| K2C1_HUMAN  | Keratin, type II cytoskeletal 1<br>OS=Homo sapiens GN=KRT1 PE=1<br>SV=6                                 |       | 95.5   | 16.9  | 2 |

|             |                                                                                                 |        |        |        |    |
|-------------|-------------------------------------------------------------------------------------------------|--------|--------|--------|----|
| KCRS_HUMAN  | Creatine kinase S-type, mitochondrial<br>OS=Homo sapiens GN=CKMT2 PE=1<br>SV=2                  | 23.5   |        | 13.3   | 1  |
| KPYM_HUMAN  | Pyruvate kinase PKM OS=Homo<br>sapiens GN=PKM PE=1 SV=4                                         | 27.5   | 116.4  | 27.0   | 1  |
| LAMA2_HUMAN | Laminin subunit alpha-2 OS=Homo<br>sapiens GN=LAMA2 PE=1 SV=4                                   | 45.5   | 68.3   | 26.3   | 2  |
| LDB3_HUMAN  | LIM domain-binding protein 3<br>OS=Homo sapiens GN=LDB3 PE=1<br>SV=2                            | 103.2  |        | 90.5   | 4  |
| LDHB_HUMAN  | L-lactate dehydrogenase B chain<br>OS=Homo sapiens GN=LDHB PE=1<br>SV=2                         |        |        | 95.7   | 1  |
| LMNA_HUMAN  | Prelamin-A/C OS=Homo sapiens<br>GN=LMNA PE=1 SV=1                                               | 268.5  | 1000.4 | 27.0   | 1  |
| LRC47_HUMAN | Leucine-rich repeat-containing<br>protein 47 OS=Homo sapiens<br>GN=LRR47 PE=1 SV=1              |        |        | 26.9   | 1  |
| M2OM_HUMAN  | Mitochondrial 2-oxoglutarate/malate<br>carrier protein OS=Homo sapiens<br>GN=SLC25A11 PE=1 SV=3 | 36.1   |        | 49.8   | 2  |
| MFAP5_HUMAN | Microfibrillar-associated protein 5<br>OS=Homo sapiens GN=MFAP5 PE=1<br>SV=1                    | 76.6   | 413.9  | 65.8   | 2  |
| MGST3_HUMAN | Microsomal glutathione S-transferase<br>3 OS=Homo sapiens GN=MGST3<br>PE=1 SV=1                 | 662.2  |        | 941.8  | 2  |
| MIC60_HUMAN | MICOS complex subunit MIC60<br>OS=Homo sapiens GN=IMMT PE=1<br>SV=1                             |        |        | 13.3   | 1  |
| MPC2_HUMAN  | Mitochondrial pyruvate carrier 2<br>OS=Homo sapiens GN=MPC2 PE=1<br>SV=1                        | 34.0   |        | 22.6   | 1  |
| MPCP_HUMAN  | Phosphate carrier protein,<br>mitochondrial OS=Homo sapiens<br>GN=SLC25A3 PE=1 SV=2             | 234.2  | 29.1   | 89.6   | 2  |
| MTCH2_HUMAN | Mitochondrial carrier homolog 2<br>OS=Homo sapiens GN=MTCH2 PE=1<br>SV=1                        | 372.2  |        | 19.8   | 1  |
| MYH7_HUMAN  | Myosin-7 OS=Homo sapiens<br>GN=MYH7 PE=1 SV=5                                                   | 3052.7 |        | 2949.5 | 22 |
| MYL3_HUMAN  | Myosin light chain 3 OS=Homo<br>sapiens GN=MYL3 PE=1 SV=3                                       | 26.6   |        | 27.0   | 1  |

|             |                                                                                                                         |       |        |        |    |
|-------------|-------------------------------------------------------------------------------------------------------------------------|-------|--------|--------|----|
| MYOM1_HUMAN | Myomesin-1 OS=Homo sapiens<br>GN=MYOM1 PE=1 SV=2                                                                        | 142.0 |        | 38.5   | 3  |
| MYOM2_HUMAN | Myomesin-2 OS=Homo sapiens<br>GN=MYOM2 PE=1 SV=2                                                                        | 113.8 |        | 90.2   | 2  |
| MYOM3_HUMAN | Myomesin-3 OS=Homo sapiens<br>GN=MYOM3 PE=2 SV=1                                                                        | 137.1 |        | 197.3  | 4  |
| MYOZ2_HUMAN | Myozenin-2 OS=Homo sapiens<br>GN=MYOZ2 PE=1 SV=1                                                                        | 57.8  |        | 31.0   | 1  |
| MYPC3_HUMAN | Myosin-binding protein C, cardiac-<br>type OS=Homo sapiens GN=MYBPC3<br>PE=1 SV=4                                       | 880.9 |        | 1077.8 | 13 |
| NDUAB_HUMAN | NADH dehydrogenase [ubiquinone]<br>1 alpha subcomplex subunit 11<br>OS=Homo sapiens GN=NDUFA11<br>PE=1 SV=3             | 73.9  |        | 27.0   | 1  |
| NDUB5_HUMAN | NADH dehydrogenase [ubiquinone]<br>1 beta subcomplex subunit 5,<br>mitochondrial OS=Homo sapiens<br>GN=NDUFB5 PE=1 SV=1 |       |        | 27.0   | 1  |
| NNTM_HUMAN  | NAD(P) transhydrogenase,<br>mitochondrial OS=Homo sapiens<br>GN=NNT PE=1 SV=3                                           | 126.3 |        | 152.9  | 1  |
| NU4M_HUMAN  | NADH-ubiquinone oxidoreductase<br>chain 4 OS=Homo sapiens GN=MT-<br>ND4 PE=1 SV=1                                       | 272.0 |        | 43.0   | 2  |
| NU5M_HUMAN  | NADH-ubiquinone oxidoreductase<br>chain 5 OS=Homo sapiens GN=MT-<br>ND5 PE=1 SV=2                                       | 390.1 |        | 185.9  | 3  |
| OBSCN_HUMAN | Obscurin OS=Homo sapiens<br>GN=OBSCN PE=1 SV=3                                                                          | 132.1 |        | 361.5  | 5  |
| PDLI5_HUMAN | PDZ and LIM domain protein 5<br>OS=Homo sapiens GN=PDLIM5 PE=1<br>SV=5                                                  | 61.0  | 22.9   | 44.5   | 2  |
| PGBM_HUMAN  | Basement membrane-specific heparan<br>sulfate proteoglycan core protein<br>OS=Homo sapiens GN=HSPG2 PE=1<br>SV=4        | 433.9 | 2232.2 | 22.8   | 1  |
| PRDX6_HUMAN | Peroxiredoxin-6 OS=Homo sapiens<br>GN=PRDX6 PE=1 SV=3                                                                   |       | 70.2   | 19.3   | 1  |
| PROS_HUMAN  | Vitamin K-dependent protein S<br>OS=Homo sapiens GN=PROS1 PE=1<br>SV=1                                                  |       |        | 27.0   | 1  |

|             |                                                                                        |         |       |         |     |
|-------------|----------------------------------------------------------------------------------------|---------|-------|---------|-----|
| QCR10_HUMAN | Cytochrome b-c1 complex subunit 10<br>OS=Homo sapiens GN=UQCR11<br>PE=3 SV=1           |         |       | 19.4    | 1   |
| RL13A_HUMAN | 60S ribosomal protein L13a<br>OS=Homo sapiens GN=RPL13A PE=1<br>SV=2                   | 20.8    | 85.6  | 25.2    | 1   |
| RYR2_HUMAN  | Ryanodine receptor 2 OS=Homo<br>sapiens GN=RYR2 PE=1 SV=3                              | 163.0   |       | 252.9   | 2   |
| SC24C_HUMAN | Protein transport protein Sec24C<br>OS=Homo sapiens GN=SEC24C PE=1<br>SV=3             |         | 40.3  | 13.7    | 1   |
| SCO2_HUMAN  | Protein SCO2 homolog,<br>mitochondrial OS=Homo sapiens<br>GN=SCO2 PE=1 SV=3            |         |       | 13.7    | 1   |
| SMYD1_HUMAN | Histone-lysine N-methyltransferase<br>SMYD1 OS=Homo sapiens<br>GN=SMYD1 PE=1 SV=1      | 159.0   |       | 184.1   | 1   |
| SRBS1_HUMAN | Sorbin and SH3 domain-containing<br>protein 1 OS=Homo sapiens<br>GN=SORBS1 PE=1 SV=3   | 280.1   |       | 149.3   | 1   |
| TANC1_HUMAN | Protein TANC1 OS=Homo sapiens<br>GN=TANC1 PE=1 SV=3                                    |         |       | 13.6    | 1   |
| TBA1A_HUMAN | Tubulin alpha-1A chain OS=Homo<br>sapiens GN=TUBA1A PE=1 SV=1                          |         | 394.5 | 58.4    | 2   |
| TBB2A_HUMAN | Tubulin beta-2A chain OS=Homo<br>sapiens GN=TUBB2A PE=1 SV=1                           |         |       | 79.3    | 1   |
| TGM2_HUMAN  | Protein-glutamine gamma-<br>glutamyltransferase 2 OS=Homo<br>sapiens GN=TGM2 PE=1 SV=2 | 464.6   | 582.2 | 31.7    | 2   |
| THIM_HUMAN  | 3-ketoacyl-CoA thiolase,<br>mitochondrial OS=Homo sapiens<br>GN=ACAA2 PE=1 SV=2        |         |       | 20.1    | 1   |
| TIMP3_HUMAN | Metalloproteinase inhibitor 3<br>OS=Homo sapiens GN=TIMP3 PE=1<br>SV=2                 | 84.6    | 21.1  | 140.0   | 2   |
| TINAL_HUMAN | Tubulointerstitial nephritis antigen-<br>like OS=Homo sapiens GN=TINAGL1<br>PE=1 SV=1  | 224.5   |       | 60.9    | 3   |
| TITIN_HUMAN | Titin OS=Homo sapiens GN=TTN<br>PE=1 SV=4                                              | 31133.7 |       | 25097.0 | 294 |
| TMCO4_HUMAN | Transmembrane and coiled-coil<br>domain-containing protein 4                           |         |       | 152.9   | 1   |

|             |                                                                                              |       |       |      |   |
|-------------|----------------------------------------------------------------------------------------------|-------|-------|------|---|
|             | OS=Homo sapiens GN=TMCO4 PE=2<br>SV=1                                                        |       |       |      |   |
| TPM1_HUMAN  | Tropomyosin alpha-1 chain<br>OS=Homo sapiens GN=TPM1 PE=1<br>SV=2                            | 88.2  | 39.3  | 58.5 | 3 |
| TSP1_HUMAN  | Thrombospondin-1 OS=Homo sapiens<br>GN=THBS1 PE=1 SV=2                                       | 268.3 | 441.7 | 23.5 | 2 |
| VDAC1_HUMAN | Voltage-dependent anion-selective<br>channel protein 1 OS=Homo sapiens<br>GN=VDAC1 PE=1 SV=2 | 158.1 |       | 75.7 | 2 |
| VDAC2_HUMAN | Voltage-dependent anion-selective<br>channel protein 2 OS=Homo sapiens<br>GN=VDAC2 PE=1 SV=2 | 176.1 |       | 13.7 | 1 |
| VDAC3_HUMAN | Voltage-dependent anion-selective<br>channel protein 3 OS=Homo sapiens<br>GN=VDAC3 PE=1 SV=1 | 85.7  |       | 24.2 | 2 |
| VTNC_HUMAN  | Vitronectin OS=Homo sapiens<br>GN=VTN PE=1 SV=1                                              | 139.0 | 202.1 | 40.9 | 1 |
| WDR1_HUMAN  | WD repeat-containing protein 1<br>OS=Homo sapiens GN=WDR1 PE=1<br>SV=4                       |       |       | 27.0 | 1 |

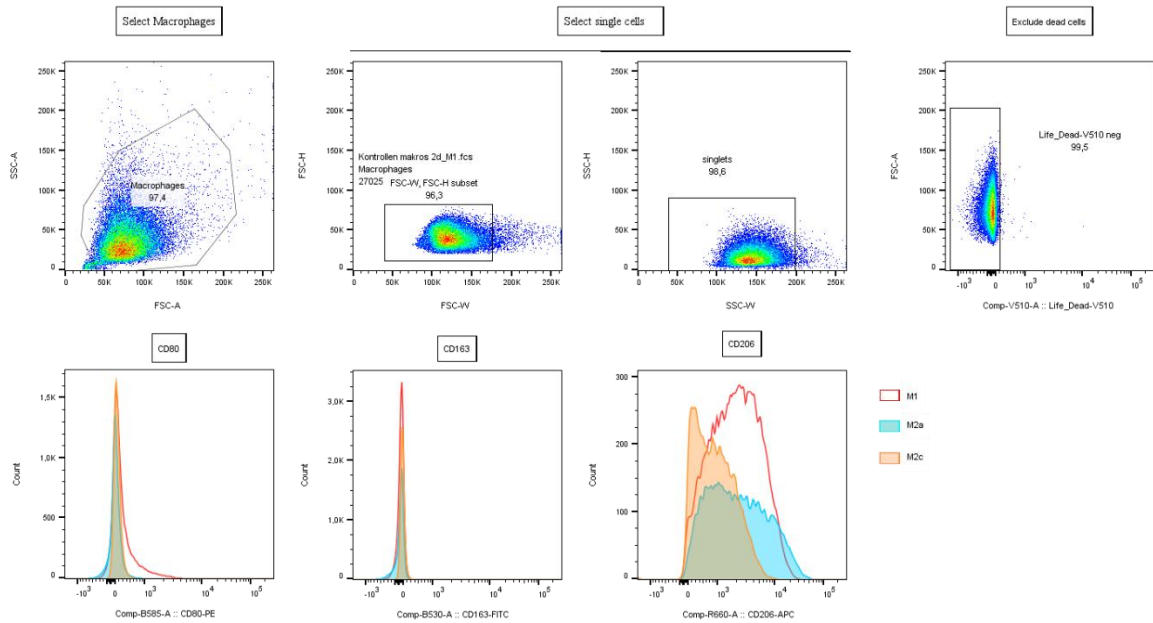

**Figure S1.** Representative flow cytometry gating strategy for macrophage polarization.



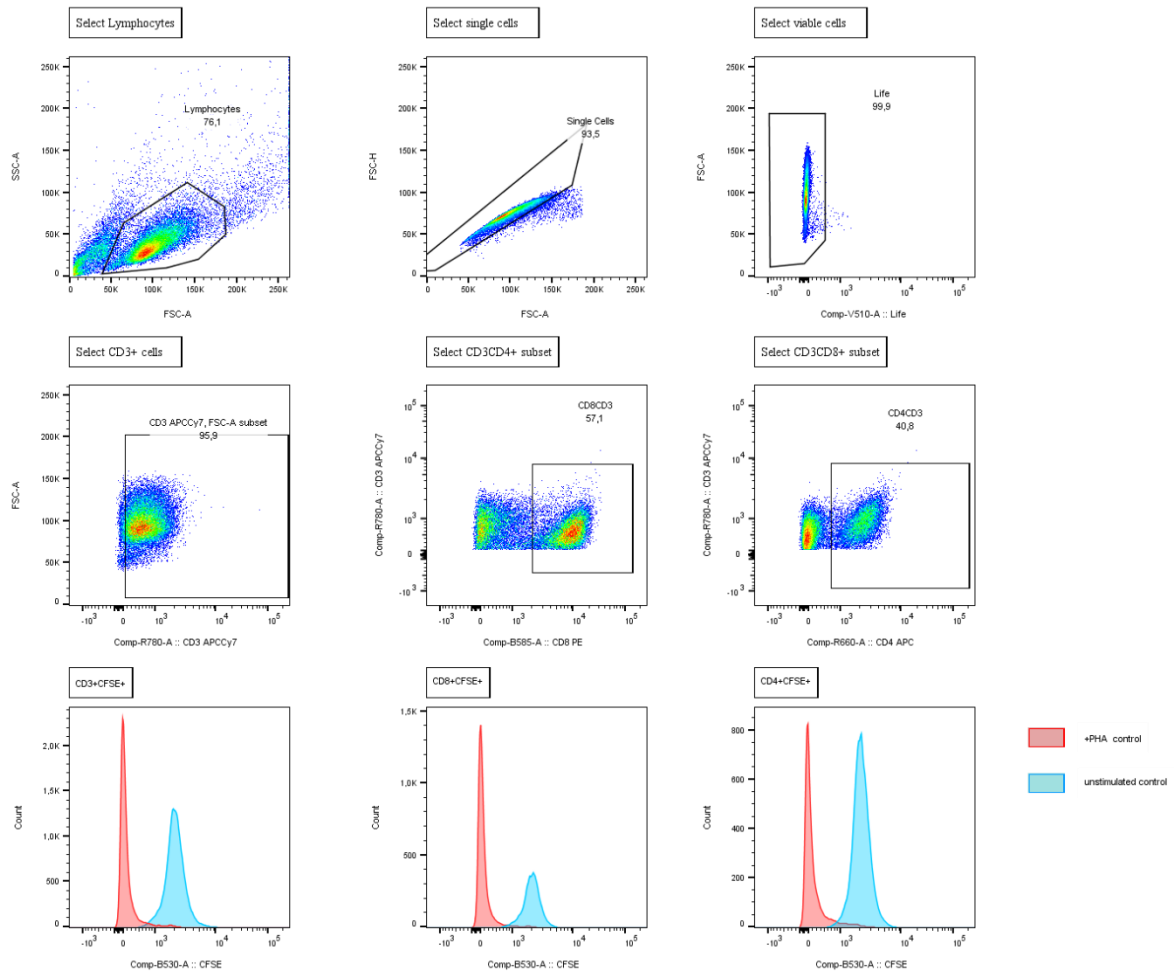

**Figure S2.** Representative flow cytometry gating strategy for T cell proliferation.
